# Supplementary material for: A Systematic View Exploring the Role of Chloroplasts in Plant Abiotic Stress Responses
Source: Hindawi journal article supplement (doi:10.1155/2019/6534745), 2019-07-18
Supplement: f2 [file 6534745.f2.pdf]

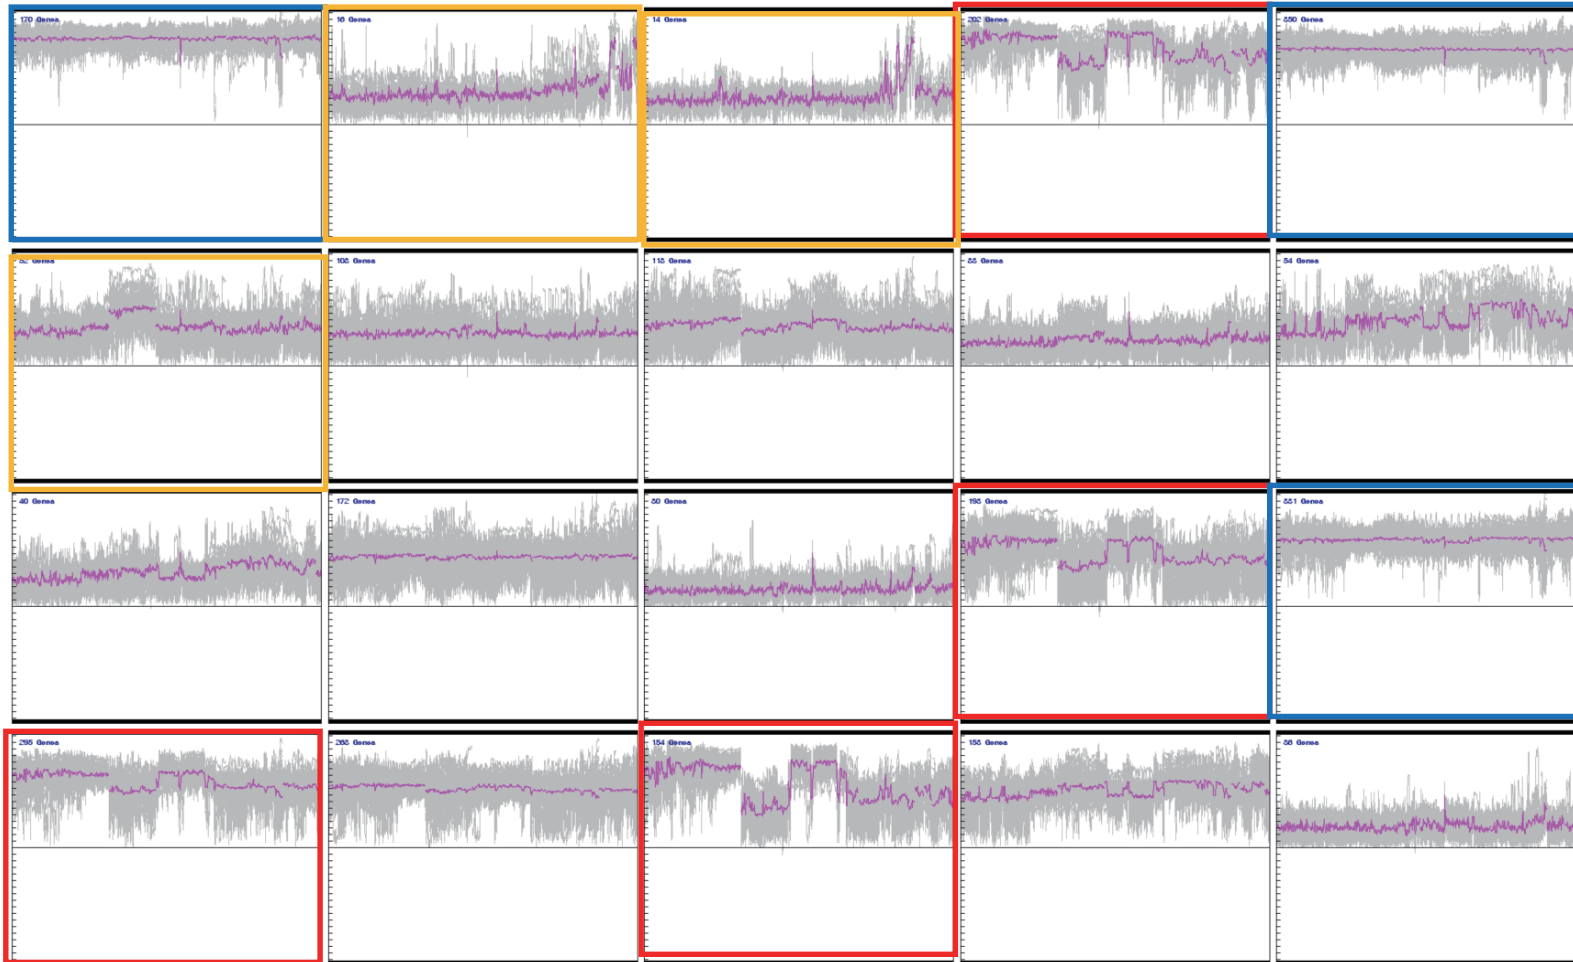

Leaf specific  
(4, 14, 16, 18)

Tissue specific  
(Seed / Anther /  
Root)

Ubiquitous  
(1,5,15)
