# Supplementary material for: A Systematic View Exploring the Role of Chloroplasts in Plant Abiotic Stress Responses
Source: Hindawi journal article supplement (doi:10.1155/2019/6534745), 2019-07-18
Supplement: f4 [file 6534745.f4.pdf]

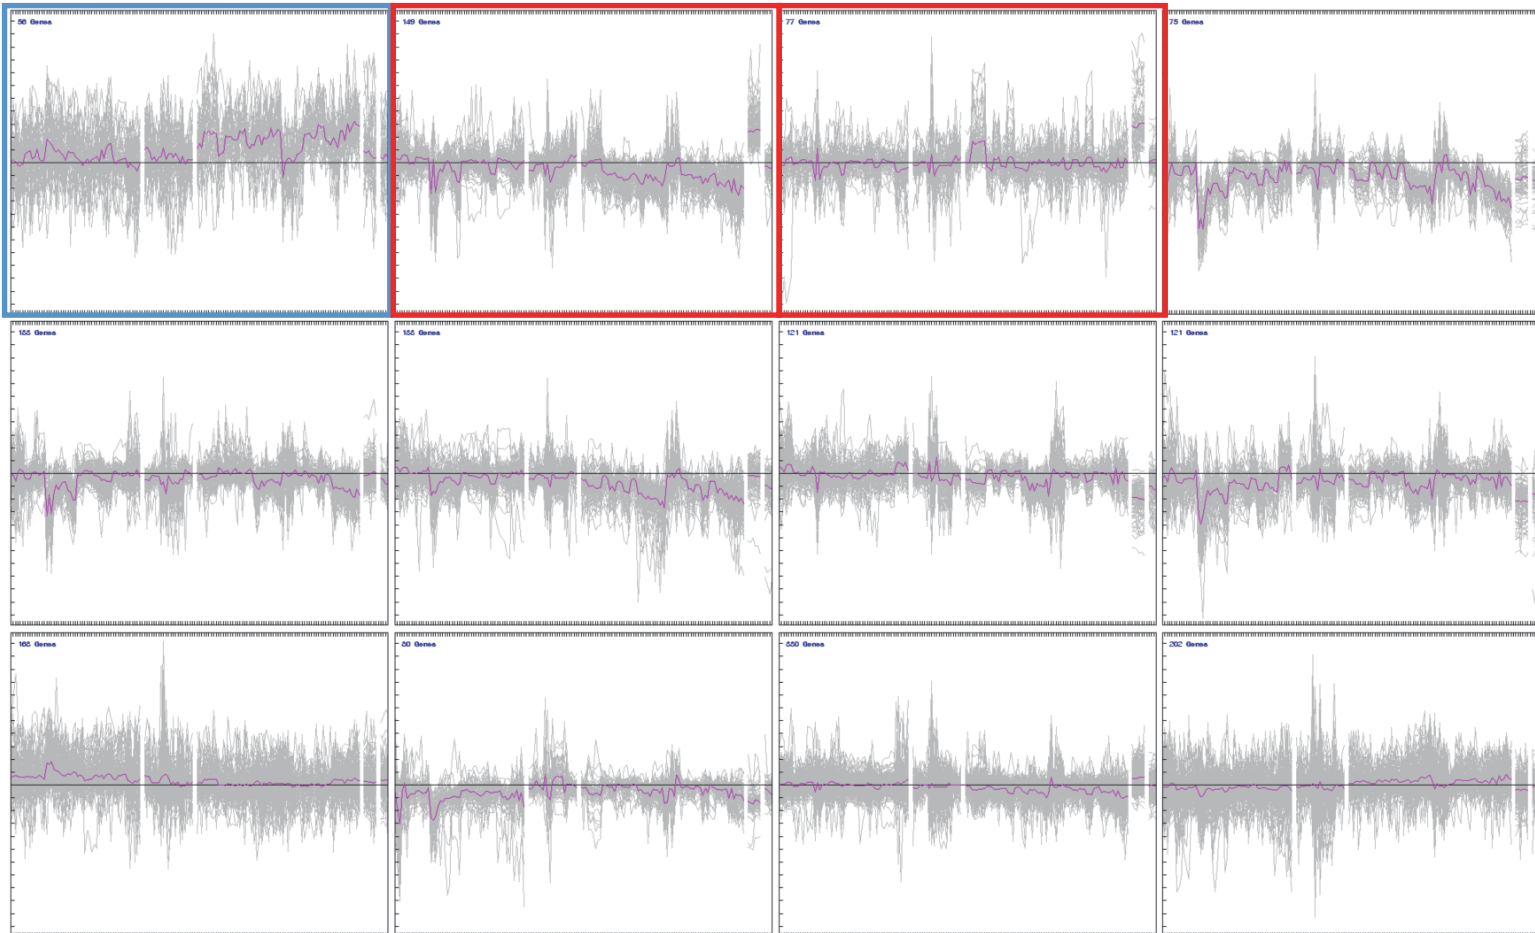

Cold  
(1)

Heat  
(2, 3)
